# Supplementary material for: Medicinal-Cosmetic Potential of the Local Endemic Plants of Crete (Greece), Northern Morocco and Tunisia: Priorities for Conservation and Sustainable Exploitation of Neglected and Underutilized Phytogenetic Resources
Source: MDPI journal article supplement (doi:10.3390/biology10121344), 2021-12-16
Supplement: s1 [file s1]

**Supplementary Material S2:** Hierarchically arranged percentages (%) of the maximum possible scores achieved regarding the medicinal-cosmetic potential of the local endemic plants of Crete, Rif-Mediterranean coast of Morocco and Tunisia (Level I evaluation) outlining blue cell cases (Highest: >70%), green cell cases (above average to high: 55-70%), yellow cell cases (above average: 50-55%), grey cell cases (below average to low: >35-50%) and no colour cases (lower: <35%). For each taxon score values regarding feasibility for sustainable exploitation (Level II evaluation) and characterization about readiness timescale for value chain creation (Level III) are retrieved from (Krigas et al. 2021).

#### A. Local endemic plants of Crete (Greece)

| Taxa                                               | Potential<br>(Level I) | Feasibility<br>(Level II) | Readiness timescale<br>(Level III) |
|----------------------------------------------------|------------------------|---------------------------|------------------------------------|
| <i>Origanum dictamnus</i>                          | 94.44                  | 91.67                     | Already achieved                   |
| <i>Sideritis syriaca</i> subsp. <i>syriaca</i>     | 81.48                  | 66.67                     | Short term                         |
| <i>Origanum microphyllum</i>                       | 59.26                  | 52.78                     | Medium term                        |
| <i>Thymbra calostachya</i>                         | 48.15                  | 55.56                     | Short term                         |
| <i>Calamintha cretica</i>                          | 46.30                  | 69.44                     | Short term                         |
| <i>Onopordum bracteatum</i> subsp. <i>creticum</i> | 46.30                  | 38.89                     | Long term                          |
| <i>Phlomis lanata</i>                              | 46.30                  | 51.39                     | Medium term                        |
| <i>Eryngium ternatum</i>                           | 44.44                  | 54.17                     | Medium term                        |
| <i>Teucrium alpestre</i>                           | 40.74                  | 36.11                     | Long term                          |
| <i>Teucrium cuneifolium</i>                        | 40.74                  | 63.89                     | Short term                         |
| <i>Campanula pelviformis</i>                       | 38.89                  | 43.06                     | Long term                          |
| <i>Helichrysum doerfleri</i>                       | 38.89                  | 45.83                     | Long term                          |
| <i>Helichrysum heldreichii</i>                     | 38.89                  | 61.11                     | Short term                         |
| <i>Hypericum amblycalyx</i>                        | 38.89                  | 33.33                     | Indeterminable                     |
| <i>Hypericum jovis</i>                             | 38.89                  | 56.94                     | Short term                         |
| <i>Muscari spreitzenhoferi</i>                     | 37.04                  | 37.5                      | Long term                          |
| <i>Petromarula pinnata</i>                         | 37.04                  | 45.83                     | Long term                          |
| <i>Anchusa cespitosa</i>                           | 35.19                  | 50                        | Medium term                        |
| <i>Campanula cretica</i>                           | 33.33                  | 36.11                     | Long term                          |
| <i>Campanula tubulosa</i>                          | 33.33                  | 33.33                     | Indeterminable                     |
| <i>Centaurea idaea</i>                             | 33.33                  | 36.11                     | Long term                          |
| <i>Medicago arborea</i> subsp. <i>strasseri</i>    | 33.33                  | 50                        | Medium term                        |
| <i>Inula candida</i> subsp. <i>decalvans</i>       | 31.48                  | 44.44                     | Long term                          |

|                                                        |       |       |                |
|--------------------------------------------------------|-------|-------|----------------|
| <i>Arum idaeum</i>                                     | 29.63 | 29.17 | Indeterminable |
| <i>Ferulago thyrsiflora</i>                            | 29.63 | 37.5  | Long term      |
| <i>Polygonum idaeum</i>                                | 29.63 | 47.22 | Long term      |
| <i>Scutellaria sieberi</i>                             | 29.63 | 36.11 | Long term      |
| <i>Viola alba</i> subsp. <i>cretica</i>                | 29.63 | 23.61 | Indeterminable |
| <i>Viola fragrans</i>                                  | 29.63 | 34.72 | Indeterminable |
| <i>Cynoglossum sphacioticum</i>                        | 27.78 | 40.28 | Long term      |
| <i>Ebenus cretica</i>                                  | 27.78 | 45.83 | Long term      |
| <i>Micromeria hispida</i>                              | 27.78 | 45.83 | Long term      |
| <i>Sanguisorba cretica</i>                             | 27.78 | 38.89 | Long term      |
| <i>Verbascum arcturus</i>                              | 27.78 | 47.22 | Long term      |
| <i>Astragalus creticus</i> subsp. <i>creticus</i>      | 25.93 | 22.22 | Indeterminable |
| <i>Astragalus creticus</i> subsp. <i>minoicus</i>      | 25.93 | 23.61 | Indeterminable |
| <i>Erysimum creticum</i>                               | 24.07 | 44.44 | Long term      |
| <i>Erysimum mutabile</i>                               | 24.07 | 29.17 | Indeterminable |
| <i>Erysimum raulinii</i>                               | 24.07 | 40.28 | Long term      |
| <i>Hypericum empetrifolium</i> subsp. <i>tortuosum</i> | 24.07 | 27.78 | Indeterminable |
| <i>Allium bourgeauii</i> subsp. <i>creticum</i>        | 22.22 | 37.5  | Long term      |
| <i>Stachelina petiolata</i>                            | 22.22 | 54.17 | Medium term    |
| <i>Allium circinnatum</i> subsp. <i>circinnatum</i>    | 20.37 | 29.17 | Indeterminable |
| <i>Allium dilatatum</i>                                | 20.37 | 27.78 | Indeterminable |
| <i>Allium platakissii</i>                              | 20.37 | 41.67 | Long term      |
| <i>Asperula crassula</i>                               | 20.37 | 48.61 | Long term      |
| <i>Asperula idaea</i>                                  | 20.37 | 38.89 | Long term      |
| <i>Asperula pubescens</i>                              | 20.37 | 33.33 | Indeterminable |
| <i>Asperula rigida</i>                                 | 20.37 | 33.33 | Indeterminable |
| <i>Biarum davisii</i>                                  | 20.37 | 41.67 | Long term      |
| <i>Biarum tenuifolium</i> subsp. <i>idomenaeum</i>     | 20.37 | 18.06 | Indeterminable |
| <i>Campanula creutzburgii</i>                          | 20.37 | 33.33 | Indeterminable |
| <i>Campanula hierapetrae</i>                           | 20.37 | 58.33 | Short term     |
| <i>Campanula jacquinii</i>                             | 20.37 | 38.89 | Long term      |
| <i>Campanula saxatilis</i> subsp. <i>saxatilis</i>     | 20.37 | 59.72 | Short term     |
| <i>Campanula spatulata</i> subsp. <i>filicaulis</i>    | 20.37 | 23.61 | Indeterminable |
| <i>Carlina diae</i>                                    | 20.37 | 58.33 | Short term     |
| <i>Centranthus sieberi</i>                             | 20.37 | 44.44 | Long term      |
| <i>Cerastium brachypetalum</i> subsp. <i>doerfleri</i> | 20.37 | 45.83 | Long term      |
| <i>Cerastium deschatresii</i>                          | 20.37 | 23.61 | Indeterminable |
| <i>Cerastium scaposum</i> subsp. <i>peninsularum</i>   | 20.37 | 26.39 | Indeterminable |
| <i>Cerastium scaposum</i> subsp. <i>scaposum</i>       | 20.37 | 26.39 | Indeterminable |

|                                                        |       |       |                |
|--------------------------------------------------------|-------|-------|----------------|
| <i>Convolvulus argyrothamnus</i>                       | 20.37 | 59.72 | Short term     |
| <i>Crepis auriculifolia</i>                            | 20.37 | 58.33 | Short term     |
| <i>Crepis sibthorpiana</i>                             | 20.37 | 52.78 | Medium term    |
| <i>Cuscuta atrans</i>                                  | 20.37 | 43.06 | Long term      |
| <i>Hieracium schmidtii</i> subsp. <i>creticum</i>      | 20.37 | 22.22 | Indeterminable |
| <i>Hypochaeris tenuiflora</i>                          | 20.37 | 33.33 | Indeterminable |
| <i>Lactuca alpestris</i>                               | 20.37 | 29.17 | Indeterminable |
| <i>Lathyrus neurolobus</i>                             | 20.37 | 41.67 | Long term      |
| <i>Limonium chersonesum</i>                            | 20.37 | 27.78 | Indeterminable |
| <i>Limonium chrisianum</i>                             | 20.37 | 27.78 | Indeterminable |
| <i>Limonium cornarianum</i>                            | 20.37 | 47.22 | Long term      |
| <i>Limonium creticum</i>                               | 20.37 | 52.78 | Medium term    |
| <i>Limonium elaphonisicum</i>                          | 20.37 | 50    | Medium term    |
| <i>Limonium grabusae</i>                               | 20.37 | 27.78 | Indeterminable |
| <i>Limonium hierapetrae</i>                            | 20.37 | 33.33 | Indeterminable |
| <i>Limonium minoicum</i>                               | 20.37 | 27.78 | Indeterminable |
| <i>Limonium recticaule</i>                             | 20.37 | 27.78 | Indeterminable |
| <i>Limonium sougiae</i>                                | 20.37 | 29.17 | Indeterminable |
| <i>Limonium xerocamposicum</i>                         | 20.37 | 27.78 | Indeterminable |
| <i>Lomelosia albocincta</i>                            | 20.37 | 38.89 | Long term      |
| <i>Lomelosia minoana</i> subsp. <i>asterusica</i>      | 20.37 | 50    | Medium term    |
| <i>Lomelosia minoana</i> subsp. <i>minoana</i>         | 20.37 | 40.28 | Long term      |
| <i>Lomelosia sphaciotica</i> subsp. <i>decalvans</i>   | 20.37 | 27.78 | Indeterminable |
| <i>Lomelosia sphaciotica</i> subsp. <i>sphaciotica</i> | 20.37 | 27.78 | Indeterminable |
| <i>Micromeria sphaciotica</i>                          | 20.37 | 40.28 | Long term      |
| <i>Ononis verae</i>                                    | 20.37 | 27.78 | Indeterminable |
| <i>Orchis sitiaca</i>                                  | 20.37 | 25    | Indeterminable |
| <i>Orchis spitzelii</i> subsp. <i>nitidifolia</i>      | 20.37 | 25    | Indeterminable |
| <i>Scorzonera mollis</i> subsp. <i>idaea</i>           | 20.37 | 45.83 | Long term      |
| <i>Silene ammophila</i> subsp. <i>ammophila</i>        | 20.37 | 52.78 | Medium term    |
| <i>Silene antri-jovis</i>                              | 20.37 | 40.28 | Long term      |
| <i>Silene flavescens</i> subsp. <i>dictaea</i>         | 20.37 | 51.39 | Medium term    |
| <i>Silene integripetala</i> subsp. <i>greuteri</i>     | 20.37 | 37.5  | Long term      |
| <i>Silene pinetorum</i> subsp. <i>pinetorum</i>        | 20.37 | 40.28 | Long term      |
| <i>Silene pinetorum</i> subsp. <i>sphaciotica</i>      | 20.37 | 40.28 | Long term      |
| <i>Silene sieberi</i>                                  | 20.37 | 36.11 | Long term      |
| <i>Silene variegata</i>                                | 20.37 | 29.17 | Indeterminable |
| <i>Tamarix minoa</i>                                   | 20.37 | 30.56 | Indeterminable |
| <i>Tragopogon lassithicus</i>                          | 20.37 | 50    | Medium term    |

|                                                      |       |       |                |
|------------------------------------------------------|-------|-------|----------------|
| <i>Acantholimon androsaceum</i>                      | 16.67 | 33.33 | Indeterminable |
| <i>Adonis cretica</i>                                | 16.67 | 22.22 | Indeterminable |
| <i>Anthemis abrotanifolia</i>                        | 16.67 | 38.89 | Long term      |
| <i>Anthemis filicaulis</i>                           | 16.67 | 33.33 | Indeterminable |
| <i>Anthemis glaberrima</i>                           | 16.67 | 62.5  | Short term     |
| <i>Anthemis samariensis</i>                          | 16.67 | 33.33 | Indeterminable |
| <i>Anthemis tomentella</i>                           | 16.67 | 33.33 | Indeterminable |
| <i>Bellevalia brevipedicellata</i>                   | 16.67 | 62.5  | Short term     |
| <i>Bellevalia juliana</i>                            | 16.67 | 44.44 | Long term      |
| <i>Bellevalia sitiaca</i>                            | 16.67 | 38.89 | Long term      |
| <i>Bufonia stricta</i> subsp. <i>cecconiana</i>      | 16.67 | 23.61 | Indeterminable |
| <i>Centaurea argentea</i> subsp. <i>chionantha</i>   | 16.67 | 45.83 | Long term      |
| <i>Centaurea argentea</i> subsp. <i>macrothysana</i> | 16.67 | 33.33 | Indeterminable |
| <i>Centaurea baldaccii</i>                           | 16.67 | 36.11 | Long term      |
| <i>Centaurea lancifolia</i>                          | 16.67 | 52.78 | Medium term    |
| <i>Centaurea poculatrix</i>                          | 16.67 | 61.11 | Short term     |
| <i>Centaurea redempta</i> subsp. <i>redempta</i>     | 16.67 | 33.33 | Indeterminable |
| <i>Galium extensum</i>                               | 16.67 | 27.78 | Indeterminable |
| <i>Galium fruticosum</i>                             | 16.67 | 44.44 | Long term      |
| <i>Galium incanum</i> subsp. <i>creticum</i>         | 16.67 | 44.44 | Long term      |
| <i>Galium incrassatum</i>                            | 16.67 | 38.89 | Long term      |
| <i>Galium incurvum</i>                               | 16.67 | 23.61 | Indeterminable |
| <i>Limonium calliopsium</i>                          | 16.67 | 47.22 | Long term      |
| <i>Linum caespitosum</i>                             | 16.67 | 27.78 | Indeterminable |
| <i>Linum doerfleri</i>                               | 16.67 | 38.89 | Long term      |
| <i>Phagnalon pygmaeum</i>                            | 16.67 | 27.78 | Indeterminable |
| <i>Sedum eriocarpum</i> subsp. <i>spathulifolium</i> | 16.67 | 22.22 | Indeterminable |
| <i>Serapias cordigera</i> subsp. <i>cretica</i>      | 16.67 | 19.44 | Indeterminable |
| <i>Alkanna sieberi</i>                               | 14.81 | 37.5  | Long term      |
| <i>Asplenium creticum</i>                            | 14.81 | 27.78 | Indeterminable |
| <i>Hypericum aciferum</i>                            | 14.81 | 48.61 | Long term      |
| <i>Hypericum kelleri</i>                             | 14.81 | 48.61 | Long term      |
| <i>Hypericum trichocaulon</i>                        | 14.81 | 29.17 | Indeterminable |
| <i>Ornithogalum dictaeum</i> subsp. <i>dictaeum</i>  | 14.81 | 33.33 | Indeterminable |
| <i>Ornithogalum insulare</i>                         | 14.81 | 22.22 | Indeterminable |
| <i>Trifolium phitosianum</i>                         | 14.81 | 18.06 | Indeterminable |
| <i>Verbascum spinosum</i>                            | 14.81 | 40.28 | Long term      |
| <i>Astragalus dolinicola</i>                         | 12.96 | 29.17 | Indeterminable |
| <i>Astragalus idaeus</i>                             | 12.96 | 50    | Medium term    |

|                                                         |       |       |                |
|---------------------------------------------------------|-------|-------|----------------|
| <i>Astragalus nummularius</i> subsp. <i>nummularius</i> | 12.96 | 27.78 | Indeterminable |
| <i>Crocus oreocreticus</i>                              | 12.96 | 41.67 | Long term      |
| <i>Crocus sieberi</i>                                   | 12.96 | 33.33 | Indeterminable |
| <i>Euphorbia rechingeri</i>                             | 12.96 | 44.44 | Long term      |
| <i>Euphorbia sultan-hassei</i>                          | 12.96 | 37.5  | Long term      |
| <i>Ranunculus cupreus</i>                               | 12.96 | 38.89 | Long term      |
| <i>Ranunculus radinotrichus</i>                         | 12.96 | 34.72 | Indeterminable |
| <i>Ranunculus veronicae</i>                             | 12.96 | 41.67 | Long term      |
| <i>Senecio fruticulosus</i>                             | 12.96 | 34.72 | Indeterminable |
| <i>Anacamptis papilionacea</i> subsp. <i>alibertis</i>  | 11.11 | 22.22 | Indeterminable |
| <i>Arabis cretica</i>                                   | 11.11 | 29.17 | Indeterminable |
| <i>Bupleurum gaudianum</i>                              | 11.11 | 51.39 | Medium term    |
| <i>Bupleurum kakiskalae</i>                             | 11.11 | 58.33 | Short term     |
| <i>Cirsium morinifolium</i>                             | 11.11 | 23.61 | Indeterminable |
| <i>Cotoneaster creticus</i>                             | 11.11 | 33.33 | Indeterminable |
| <i>Dianthus fruticosus</i> subsp. <i>creticus</i>       | 11.11 | 34.72 | Indeterminable |
| <i>Dianthus fruticosus</i> subsp. <i>sitiacus</i>       | 11.11 | 30.56 | Indeterminable |
| <i>Dianthus juniperinus</i> subsp. <i>aciphyllus</i>    | 11.11 | 33.33 | Indeterminable |
| <i>Dianthus juniperinus</i> subsp. <i>bauhinorum</i>    | 11.11 | 51.39 | Medium term    |
| <i>Dianthus juniperinus</i> subsp. <i>heldreichii</i>   | 11.11 | 33.33 | Indeterminable |
| <i>Dianthus juniperinus</i> subsp. <i>idaeus</i>        | 11.11 | 33.33 | Indeterminable |
| <i>Dianthus juniperinus</i> subsp. <i>juniperinus</i>   | 11.11 | 33.33 | Indeterminable |
| <i>Dianthus juniperinus</i> subsp. <i>kavusicus</i>     | 11.11 | 50    | Medium term    |
| <i>Dianthus juniperinus</i> subsp. <i>pulviniformis</i> | 11.11 | 33.33 | Indeterminable |
| <i>Dianthus sphacioticus</i>                            | 11.11 | 34.72 | Indeterminable |
| <i>Dianthus xylorrhizus</i>                             | 11.11 | 58.33 | Short term     |
| <i>Draba cretica</i>                                    | 11.11 | 36.11 | Long term      |
| <i>Festuca polita</i> subsp. <i>cretica</i>             | 11.11 | 18.06 | Indeterminable |
| <i>Gagea omalensis</i>                                  | 11.11 | 27.78 | Indeterminable |
| <i>Myosotis solange</i>                                 | 11.11 | 40.28 | Long term      |
| <i>Nepeta sphaciotica</i>                               | 11.11 | 62.5  | Short term     |
| <i>Onobrychis sphaciotica</i>                           | 11.11 | 52.78 | Medium term    |
| <i>Prunella cretensis</i>                               | 11.11 | 34.72 | Indeterminable |
| <i>Scilla nana</i> subsp. <i>albescens</i>              | 11.11 | 23.61 | Indeterminable |
| <i>Scilla nana</i> subsp. <i>nana</i>                   | 11.11 | 20.83 | Indeterminable |
| <i>Zelkova abelicea</i>                                 | 11.11 | 52.78 | Medium term    |
| <i>Colchicum cretense</i>                               | 9.26  | 29.17 | Indeterminable |
| <i>Cyclamen graecum</i> subsp. <i>candicum</i>          | 9.26  | 44.44 | Long term      |
| <i>Alyssum fragillimum</i>                              | 7.41  | 44.44 | Long term      |

|                                                          |      |       |                |
|----------------------------------------------------------|------|-------|----------------|
| <i>Alyssum idaeum</i>                                    | 7.41 | 51.39 | Medium term    |
| <i>Alyssum lassiticum</i>                                | 7.41 | 38.89 | Long term      |
| <i>Alyssum sphacioticum</i>                              | 7.41 | 50    | Medium term    |
| <i>Bolanthus creutzburgii</i> subsp. <i>creutzburgii</i> | 7.41 | 27.78 | Indeterminable |
| <i>Bolanthus creutzburgii</i> subsp. <i>zaffranii</i>    | 7.41 | 44.44 | Long term      |
| <i>Brachypodium sylvaticum</i> subsp. <i>creticum</i>    | 7.41 | 34.72 | Indeterminable |
| <i>Carex cretica</i>                                     | 7.41 | 25    | Indeterminable |
| <i>Carex idaea</i>                                       | 7.41 | 19.44 | Indeterminable |
| <i>Catapodium borgesii</i>                               | 7.41 | 27.78 | Indeterminable |
| <i>Cephalanthera cucullata</i>                           | 7.41 | 43.06 | Long term      |
| <i>Chaenorhinum idaeum</i>                               | 7.41 | 34.72 | Indeterminable |
| <i>Chaerophyllum creticum</i>                            | 7.41 | 52.78 | Medium term    |
| <i>Cherleria wettsteinii</i>                             | 7.41 | 34.72 | Indeterminable |
| <i>Epipactis cretica</i>                                 | 7.41 | 25    | Indeterminable |
| <i>Filago wagenitziana</i>                               | 7.41 | 29.17 | Indeterminable |
| <i>Fritillaria messanensis</i> subsp. <i>sphaciotica</i> | 7.41 | 18.06 | Indeterminable |
| <i>Geocaryum creticum</i>                                | 7.41 | 38.89 | Long term      |
| <i>Himantoglossum samariense</i>                         | 7.41 | 18.06 | Indeterminable |
| <i>Horstrissea dolinicola</i>                            | 7.41 | 45.83 | Long term      |
| <i>Klasea cretica</i>                                    | 7.41 | 26.39 | Indeterminable |
| <i>Noccaea cretica</i>                                   | 7.41 | 34.72 | Indeterminable |
| <i>Noccaea zaffranii</i>                                 | 7.41 | 41.67 | Long term      |
| <i>Petrorhagia candida</i>                               | 7.41 | 37.5  | Long term      |
| <i>Petrorhagia dianthoides</i>                           | 7.41 | 47.22 | Long term      |
| <i>Prospero battagliae</i>                               | 7.41 | 15.28 | Indeterminable |
| <i>Prospero depressum</i>                                | 7.41 | 31.94 | Indeterminable |
| <i>Prospero hierapytnense</i>                            | 7.41 | 22.22 | Indeterminable |
| <i>Prospero idaeum</i>                                   | 7.41 | 31.94 | Indeterminable |
| <i>Prospero rhadamanthi</i>                              | 7.41 | 38.89 | Long term      |
| <i>Prospero talosii</i>                                  | 7.41 | 33.33 | Indeterminable |
| <i>Ricotia cretica</i>                                   | 7.41 | 34.72 | Indeterminable |
| <i>Sesleria doerfleri</i>                                | 7.41 | 56.94 | Short term     |
| <i>Telephium imperati</i> subsp. <i>pauciflorum</i>      | 7.41 | 18.06 | Indeterminable |
| <i>Tulipa bakeri</i>                                     | 7.41 | 41.67 | Long term      |
| <i>Tulipa cretica</i>                                    | 7.41 | 41.67 | Long term      |
| <i>Tulipa doerfleri</i>                                  | 7.41 | 40.28 | Long term      |
| <i>Corydalis uniflora</i>                                | 5.56 | 20.83 | Indeterminable |
| <i>Dactylis glomerata</i> subsp. <i>rigida</i>           | 5.56 | 37.5  | Long term      |
| <i>Scutellaria hirta</i>                                 | 5.56 | 29.17 | Indeterminable |

|                                            |      |       |                |
|--------------------------------------------|------|-------|----------------|
| <i>Clematis elisabethae-carolae</i>        | 3.70 | 44.44 | Long term      |
| <i>Cyclamen confusum</i>                   | 0.00 | 31.94 | Indeterminable |
| <i>Securigera globosa</i>                  | 0.00 | 43.06 | Long term      |
| <i>Vincetoxicum creticum</i>               | 0.00 | 38.89 | Long term      |
| <i>Viscum album</i> subsp. <i>creticum</i> | 0.00 | 16.67 | Indeterminable |

## B. Local endemic plants of Morocco (Rif-Mediterranean coast)

| Taxa                                                   | Potential<br>(Level I) | Feasibility<br>(Level II) | Readiness timescale<br>(Level III) |
|--------------------------------------------------------|------------------------|---------------------------|------------------------------------|
| <i>Centaureum erythraea</i> subsp. <i>bifrons</i>      | 72.22                  | 40.28                     | Long term                          |
| <i>Origanum elongatum</i>                              | 55.55                  | 36.11                     | Long term                          |
| <i>Abies marocana</i>                                  | 44.44                  | 43.06                     | Long term                          |
| <i>Malva vidalii</i>                                   | 35.19                  | 30.56                     | Indeterminable                     |
| <i>Rumex brachypodus</i>                               | 35.19                  | 18.06                     | Indeterminable                     |
| <i>Centaureum barrelieroides</i>                       | 27.78                  | 22.22                     | Indeterminable                     |
| <i>Marrubium fontianum</i>                             | 27.78                  | 22.22                     | Indeterminable                     |
| <i>Marrubium heterocladum</i>                          | 27.78                  | 23.61                     | Indeterminable                     |
| <i>Salvia interrupta</i> subsp. <i>pau</i>             | 27.78                  | 25.00                     | Indeterminable                     |
| <i>Scrophularia eriocalyx</i>                          | 27.78                  | 22.22                     | Indeterminable                     |
| <i>Scrophularia fontqueri</i>                          | 27.78                  | 25.00                     | Indeterminable                     |
| <i>Sideritis romoi</i>                                 | 27.78                  | 16.67                     | Indeterminable                     |
| <i>Astragalus meuselii</i>                             | 25.93                  | 18.06                     | Indeterminable                     |
| <i>Astragalus tetuanensis</i>                          | 25.93                  | 26.39                     | Indeterminable                     |
| <i>Sonchus briquetianus</i>                            | 25.93                  | 22.22                     | Indeterminable                     |
| <i>Sonchus fragilis</i>                                | 25.93                  | 25.00                     | Indeterminable                     |
| <i>Sonchus masguindalii</i>                            | 25.93                  | 36.11                     | Long term                          |
| <i>Vicia cedretorum</i>                                | 25.93                  | 22.22                     | Indeterminable                     |
| <i>Acis tingitana</i>                                  | 24.07                  | 31.94                     | Indeterminable                     |
| <i>Stachys fontqueri</i>                               | 22.22                  | 18.06                     | Indeterminable                     |
| <i>Cytisus grandiflorus</i> subsp. <i>haplophyllus</i> | 20.37                  | 12.50                     | Indeterminable                     |
| <i>Cytisus striatus</i> subsp. <i>megalanthus</i>      | 20.37                  | 9.72                      | Indeterminable                     |
| <i>Echium canum</i>                                    | 20.37                  | 22.22                     | Indeterminable                     |
| <i>Ammiopsis daucooides</i>                            | 18.52                  | 8.33                      | Indeterminable                     |
| <i>Anthemis mauritiana</i> subsp. <i>mauritiana</i>    | 18.52                  | 29.17                     | Indeterminable                     |
| <i>Antirrhinum martenii</i>                            | 18.52                  | 30.56                     | Indeterminable                     |
| <i>Armeria alpinifolia</i>                             | 18.52                  | 30.56                     | Indeterminable                     |
| <i>Bromus erectus</i> subsp. <i>microchaetus</i>       | 18.52                  | 38.89                     | Long term                          |
| <i>Carduus martinezii</i> subsp. <i>fontqueri</i>      | 18.52                  | 22.22                     | Indeterminable                     |

|                                                             |       |       |                |
|-------------------------------------------------------------|-------|-------|----------------|
| <i>Centaurea alibeyana</i>                                  | 18.52 | 25.00 | Indeterminable |
| <i>Centaurea monticola</i> subsp. <i>orthoacantha</i>       | 18.52 | 22.22 | Indeterminable |
| <i>Centaurea oriolii-bolosii</i>                            | 18.52 | 22.22 | Indeterminable |
| <i>Centaurea xaveri</i>                                     | 18.52 | 25.00 | Indeterminable |
| <i>Convolvulus vidalii</i>                                  | 18.52 | 29.17 | Indeterminable |
| <i>Eryngium caespitiferum</i>                               | 18.52 | 25.00 | Indeterminable |
| <i>Ferula bolivari</i>                                      | 18.52 | 22.22 | Indeterminable |
| <i>Ferula fontqueri</i>                                     | 18.52 | 13.89 | Indeterminable |
| <i>Fumaria macrosepala</i> subsp. <i>megasepala</i>         | 18.52 | 27.78 | Indeterminable |
| <i>Fumaria macrosepala</i> subsp. <i>obscura</i>            | 18.52 | 27.78 | Indeterminable |
| <i>Fumaria ouezzanensis</i> subsp. <i>ramosa</i>            | 18.52 | 26.39 | Indeterminable |
| <i>Fumaria sepium</i> subsp. <i>rugosa</i>                  | 18.52 | 26.39 | Indeterminable |
| <i>Genista carpetana</i> subsp. <i>nociva</i>               | 18.52 | 23.61 | Indeterminable |
| <i>Genista osmariensis</i>                                  | 18.52 | 25.00 | Indeterminable |
| <i>Genista oxycedrina</i>                                   | 18.52 | 19.44 | Indeterminable |
| <i>Helianthemum grosii</i>                                  | 18.52 | 30.56 | Indeterminable |
| <i>Herniaria boissieri</i> subsp. <i>maroccana</i>          | 18.52 | 29.17 | Indeterminable |
| <i>Hieracium riofrioi</i>                                   | 18.52 | 22.22 | Indeterminable |
| <i>Hypericum andjerinum</i>                                 | 18.52 | 25.00 | Indeterminable |
| <i>Iberis contracta</i> subsp. <i>rifana</i>                | 18.52 | 18.06 | Indeterminable |
| <i>Iberis grosmiquelii</i>                                  | 18.52 | 22.22 | Indeterminable |
| <i>Lathyrus coerulescens</i>                                | 18.52 | 13.89 | Indeterminable |
| <i>Linum austriacum</i> subsp. <i>gomaricum</i>             | 18.52 | 22.22 | Indeterminable |
| <i>Matthiola masguindalii</i>                               | 18.52 | 18.06 | Indeterminable |
| <i>Ononis alopecuroides</i> subsp. <i>simulata</i>          | 18.52 | 30.56 | Indeterminable |
| <i>Ononis gines-lopezii</i>                                 | 18.52 | 13.89 | Indeterminable |
| <i>Paronychia maroccana</i>                                 | 18.52 | 23.61 | Indeterminable |
| <i>Ptilostemon abylenensis</i>                              | 18.52 | 20.83 | Indeterminable |
| <i>Saxifraga maweana</i>                                    | 18.52 | 23.61 | Indeterminable |
| <i>Saxifraga rigoi</i> subsp. <i>maroccana</i>              | 18.52 | 30.56 | Indeterminable |
| <i>Saxifraga tricrenata</i>                                 | 18.52 | 31.94 | Indeterminable |
| <i>Saxifraga wernerii</i>                                   | 18.52 | 33.33 | Indeterminable |
| <i>Sedum mucizonia</i> subsp. <i>abylaea</i>                | 18.52 | 18.06 | Indeterminable |
| <i>Silene abietum</i>                                       | 18.52 | 22.22 | Indeterminable |
| <i>Silene lagrangei</i>                                     | 18.52 | 25.00 | Indeterminable |
| <i>Silene rhiphaena</i>                                     | 18.52 | 30.56 | Indeterminable |
| <i>Silene vidaliana</i>                                     | 18.52 | 22.22 | Indeterminable |
| <i>Teucrium afrum</i> subsp. <i>rubriflorum</i>             | 18.52 | 23.61 | Indeterminable |
| <i>Teucrium chlorostachyum</i> subsp. <i>chlorostachyum</i> | 18.52 | 30.56 | Indeterminable |



|                                                               |       |       |                |
|---------------------------------------------------------------|-------|-------|----------------|
| <i>Teucrium chlorostachyum</i> subsp. <i>melillense</i>       | 18.52 | 30.56 | Indeterminable |
| <i>Teucrium grosii</i>                                        | 18.52 | 26.39 | Indeterminable |
| <i>Teucrium gypsophilum</i>                                   | 18.52 | 30.56 | Indeterminable |
| <i>Teucrium huotii</i>                                        | 18.52 | 25.00 | Indeterminable |
| <i>Teucrium rifanum</i>                                       | 18.52 | 29.17 | Indeterminable |
| <i>Teucrium rotundifolium</i> subsp. <i>sanguisorbifolium</i> | 18.52 | 19.44 | Indeterminable |
| <i>Trifolium tastetii</i>                                     | 18.52 | 15.28 | Indeterminable |
| <i>Xiphion rutherfordii</i>                                   | 18.52 | 36.11 | Long term      |
| <i>Narcissus albimarginatus</i>                               | 12.96 | 16.67 | Indeterminable |
| <i>Anthyllis vulneraria</i> subsp. <i>ajmasiana</i>           | 11.11 | 30.56 | Indeterminable |
| <i>Anthyllis vulneraria</i> subsp. <i>fatmae</i>              | 11.11 | 38.89 | Long term      |
| <i>Arabis pubescens</i> subsp. <i>leucanthemifolia</i>        | 11.11 | 13.89 | Indeterminable |
| <i>Bromopsis maroccana</i>                                    | 11.11 | 30.56 | Indeterminable |
| <i>Cephalaria mauritanica</i> subsp. <i>rifana</i>            | 11.11 | 20.83 | Indeterminable |
| <i>Fumana fontqueri</i>                                       | 11.11 | 16.67 | Indeterminable |
| <i>Hemicrambe fruticulosa</i>                                 | 11.11 | 29.17 | Indeterminable |
| <i>Leucanthemopsis longipectinata</i>                         | 11.11 | 13.89 | Indeterminable |
| <i>Mantisalca amberboides</i>                                 | 11.11 | 8.33  | Indeterminable |
| <i>Moehringia glochidisperma</i>                              | 11.11 | 25.00 | Indeterminable |
| <i>Rhodalsine senneniana</i>                                  | 11.11 | 25.00 | Indeterminable |
| <i>Rhodanthemum hosmariense</i>                               | 11.11 | 36.11 | Long term      |
| <i>Santolina adscensionis</i>                                 | 11.11 | 16.67 | Indeterminable |
| <i>Sideritis arborescens</i> subsp. <i>maireana</i>           | 11.11 | 16.67 | Indeterminable |
| <i>Festuca embergeri</i>                                      | 3.70  | 8.33  | Indeterminable |
| <i>Festuca fontqueriana</i>                                   | 3.70  | 12.50 | Indeterminable |
| <i>Festuca rifana</i>                                         | 3.70  | 18.06 | Indeterminable |

### C. Local endemic plants of Tunisia

| Taxa                                                     | Potential<br>(Level I) | Feasibility<br>(Level II) | Readiness timescale<br>(Level III) |
|----------------------------------------------------------|------------------------|---------------------------|------------------------------------|
| <i>Teucrium alopecurus</i>                               | 57.41                  | 27.78                     | Indeterminable                     |
| <i>Teucrium sauvagei</i>                                 | 53.70                  | 22.22                     | Indeterminable                     |
| <i>Artemisia campestris</i> subsp. <i>cinerea</i>        | 50.00                  | 50.00                     | Medium term                        |
| <i>Marrubium aschersonii</i>                             | 48.15                  | 26.39                     | Indeterminable                     |
| <i>Calendula suffruticosa</i> subsp. <i>suffruticosa</i> | 38.89                  | 36.11                     | Long term                          |
| <i>Ferula tunetana</i>                                   | 38.89                  | 22.22                     | Indeterminable                     |
| <i>Teucrium luteum</i> subsp. <i>gabesianum</i>          | 35.19                  | 25.00                     | Indeterminable                     |
| <i>Rumex tunetanus</i>                                   | 27.78                  | 31.94                     | Indeterminable                     |

|                                                          |       |       |                |
|----------------------------------------------------------|-------|-------|----------------|
| <i>Teucrium nablîi</i>                                   | 25.93 | 30.56 | Indeterminable |
| <i>Bituminaria tunetana</i>                              | 24.07 | 5.56  | Indeterminable |
| <i>Centaurea sicula</i> subsp. <i>kroumirensis</i>       | 24.07 | 20.83 | Indeterminable |
| <i>Dianthus cintranus</i> subsp. <i>byzacenus</i>        | 24.07 | 19.44 | Indeterminable |
| <i>Dianthus rupicola</i> subsp. <i>hermaeensis</i>       | 24.07 | 26.39 | Indeterminable |
| <i>Elaeoselinum tunetanum</i>                            | 24.07 | 16.67 | Indeterminable |
| <i>Erinacea schoenenbergeri</i>                          | 24.07 | 11.11 | Indeterminable |
| <i>Galium afropusillum</i>                               | 24.07 | 27.78 | Indeterminable |
| <i>Galium olivetorum</i>                                 | 24.07 | 23.61 | Indeterminable |
| <i>Helianthemum crassifolium</i> subsp. <i>djeniense</i> | 24.07 | 23.61 | Indeterminable |
| <i>Helianthemum virgatum</i> subsp. <i>africanum</i>     | 24.07 | 20.83 | Indeterminable |
| <i>Lathyrus brachyodon</i>                               | 24.07 | 20.83 | Indeterminable |
| <i>Limonium boitardii</i>                                | 24.07 | 23.61 | Indeterminable |
| <i>Limonium byzacium</i>                                 | 24.07 | 23.61 | Indeterminable |
| <i>Limonium cercinense</i>                               | 24.07 | 27.78 | Indeterminable |
| <i>Limonium clupearum</i>                                | 24.07 | 27.78 | Indeterminable |
| <i>Limonium comosum</i>                                  | 24.07 | 23.61 | Indeterminable |
| <i>Limonium confertum</i>                                | 24.07 | 25.00 | Indeterminable |
| <i>Limonium elfahsianum</i>                              | 24.07 | 27.78 | Indeterminable |
| <i>Limonium formosum</i>                                 | 24.07 | 23.61 | Indeterminable |
| <i>Limonium hipponense</i>                               | 24.07 | 23.61 | Indeterminable |
| <i>Limonium intricatum</i>                               | 24.07 | 27.78 | Indeterminable |
| <i>Limonium kairouanum</i>                               | 24.07 | 27.78 | Indeterminable |
| <i>Limonium korbousense</i>                              | 24.07 | 27.78 | Indeterminable |
| <i>Limonium lacertosum</i>                               | 24.07 | 23.61 | Indeterminable |
| <i>Limonium menigense</i>                                | 24.07 | 27.78 | Indeterminable |
| <i>Limonium neapolense</i>                               | 24.07 | 27.78 | Indeterminable |
| <i>Limonium oblanceolatum</i>                            | 24.07 | 23.61 | Indeterminable |
| <i>Limonium punicum</i>                                  | 24.07 | 23.61 | Indeterminable |
| <i>Limonium pyramidatum</i>                              | 24.07 | 27.78 | Indeterminable |
| <i>Limonium rubescens</i>                                | 24.07 | 23.61 | Indeterminable |
| <i>Limonium serratum</i>                                 | 24.07 | 27.78 | Indeterminable |
| <i>Limonium tacapense</i>                                | 24.07 | 23.61 | Indeterminable |
| <i>Limonium thaenicum</i>                                | 24.07 | 27.78 | Indeterminable |
| <i>Limonium tritonianum</i>                              | 24.07 | 23.61 | Indeterminable |
| <i>Limonium xerophyllum</i>                              | 24.07 | 27.78 | Indeterminable |
| <i>Limonium zembrae</i>                                  | 24.07 | 27.78 | Indeterminable |
| <i>Limonium zeugitanum</i>                               | 24.07 | 27.78 | Indeterminable |
| <i>Odontites citrinus</i>                                | 24.07 | 9.72  | Indeterminable |

|                                                         |       |       |                |
|---------------------------------------------------------|-------|-------|----------------|
| <i>Sideritis tunetana</i>                               | 24.07 | 22.22 | Indeterminable |
| <i>Silene barrattei</i>                                 | 24.07 | 20.83 | Indeterminable |
| <i>Thymelaea sempervirens</i>                           | 24.07 | 22.22 | Indeterminable |
| <i>Trifolium tunetanum</i>                              | 24.07 | 20.83 | Indeterminable |
| <i>Clematis tunisiatica</i>                             | 22.22 | 20.83 | Indeterminable |
| <i>Delphinium sylvaticum</i> subsp. <i>ichkeulianum</i> | 22.22 | 27.78 | Indeterminable |
| <i>Astragalus asterias</i> subsp. <i>aristidis</i>      | 20.37 | 19.44 | Indeterminable |
| <i>Crepis juvenalis</i>                                 | 20.37 | 5.56  | Indeterminable |
| <i>Lomelosia robertii</i>                               | 20.37 | 27.78 | Indeterminable |
| <i>Sixalix lehoueroui</i>                               | 20.37 | 27.78 | Indeterminable |
| <i>Sixalix thysdrusiana</i>                             | 20.37 | 18.06 | Indeterminable |
| <i>Teucrium radicans</i>                                | 20.37 | 27.78 | Indeterminable |
| <i>Linaria multicaulis</i> subsp. <i>multicaulis</i>    | 16.67 | 13.89 | Indeterminable |
| <i>Ophrys omegaifera</i> subsp. <i>hayekii</i>          | 16.67 | 25.00 | Indeterminable |
| <i>Ophrys pseudomigoutiana</i>                          | 16.67 | 13.89 | Indeterminable |
| <i>Ophrys x carpitana</i>                               | 16.67 | 27.78 | Indeterminable |
| <i>Serapias × debelairii</i>                            | 16.67 | 23.61 | Indeterminable |
| <i>Anarrhinum brevifolium</i>                           | 14.81 | 11.11 | Indeterminable |
| <i>Bellevalia dolichophylla</i>                         | 14.81 | 27.78 | Indeterminable |
| <i>Bellevalia galitensis</i>                            | 14.81 | 27.78 | Indeterminable |
| <i>Erysimum teppneri</i>                                | 14.81 | 22.22 | Indeterminable |
| <i>Hyacinthoides kroumiriensis</i>                      | 14.81 | 15.28 | Indeterminable |
| <i>Linaria aegyptiaca</i> subsp. <i>glutinosa</i>       | 12.96 | 27.78 | Indeterminable |
| <i>Linaria cossonii</i>                                 | 12.96 | 20.83 | Indeterminable |
| <i>Linaria paradoxa</i>                                 | 12.96 | 25.00 | Indeterminable |
| <i>Linaria pseudoviscosa</i>                            | 12.96 | 27.78 | Indeterminable |
| <i>Linaria reflexa</i> subsp. <i>doumetii</i>           | 12.96 | 27.78 | Indeterminable |
| <i>Linaria virgata</i> subsp. <i>syrtica</i>            | 12.96 | 22.22 | Indeterminable |
| <i>Linaria virgata</i> subsp. <i>tunetana</i>           | 12.96 | 25.00 | Indeterminable |
| <i>Arabis tunetana</i>                                  | 7.41  | 12.50 | Indeterminable |
| <i>Festuca scholziana</i>                               | 7.41  | 18.06 | Indeterminable |
| <i>Oncostema maireana</i>                               | 7.41  | 18.06 | Indeterminable |
| <i>Poa lehoueroui</i>                                   | 7.41  | 16.67 | Indeterminable |
| <i>Sporobolus tourneuxii</i>                            | 7.41  | 27.78 | Indeterminable |
| <i>Stipa alba</i>                                       | 7.41  | 27.78 | Indeterminable |

## References

Krigas, N.; Tsoktouridis, G.; Anestis, I.; Khabbach, A.; Libiad, M.; Megdiche-Ksouri, W.; Ghrabi-Gammar, Z.; Lamchouri, F.; Tsiropidis, I.; Tsiadouli, M. Exploring the potential of neglected local endemic plants of three

Mediterranean regions in the ornamental sector: Value chain feasibility and readiness timescale for their sustainable exploitation. *Sustainability*. **2021**, *13*, 2539.
